# Supplementary material for: The non-canonical ubiquitin activating enzyme UBA6 suppresses epithelial-mesenchymal transition of mammary epithelial cells
Source: Oncotarget. 2017 Sep 15;8(50):87480–93. doi: 10.18632/oncotarget.20900 (PMC5675648; doi:10.18632/oncotarget.20900)
Supplement: Supplementary file 1 [file oncotarget-08-87480-s001.pdf]

# The non-canonical ubiquitin activating enzyme UBA6 suppresses epithelial-mesenchymal transition of mammary epithelial cells

## SUPPLEMENTARY MATERIALS

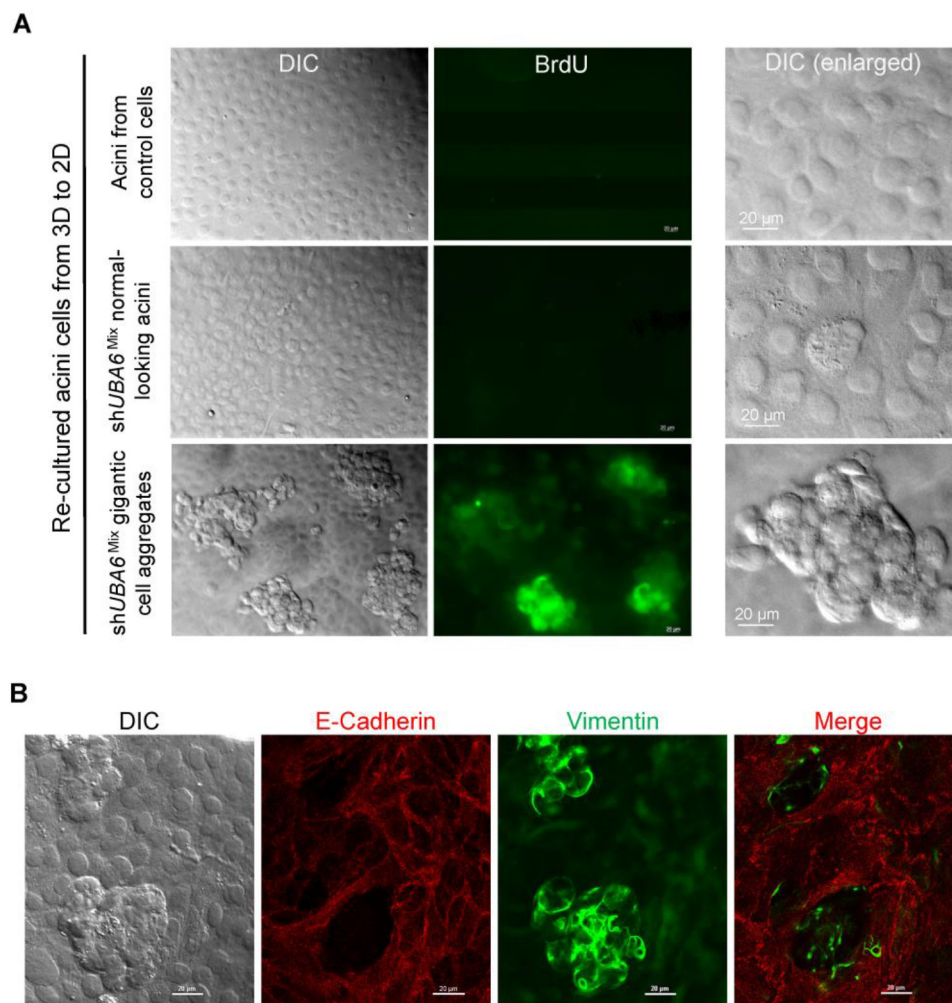

**Supplementary Figure 1: The MCF10A cells from 3D gigantic cell aggregates form “island”-like cell clusters and undergo EMT when re-cultured as monolayer in normal medium. (A)** Representative fluorescence microscope pictures show the formation of “island”-like cell clusters and the enhanced BrdU incorporation in 2D culture only in shUBA6<sup>Mix</sup> cells that are re-cultured from 3D gigantic cells aggregates, but not in shUBA6<sup>Mix</sup> cells re-cultured from normal-looking acini or in control cells. **(B)** Representative pictures of Immunofluorescence microscopy for EMT markers E-cadherin and Vimentin in cells within the “islands”.

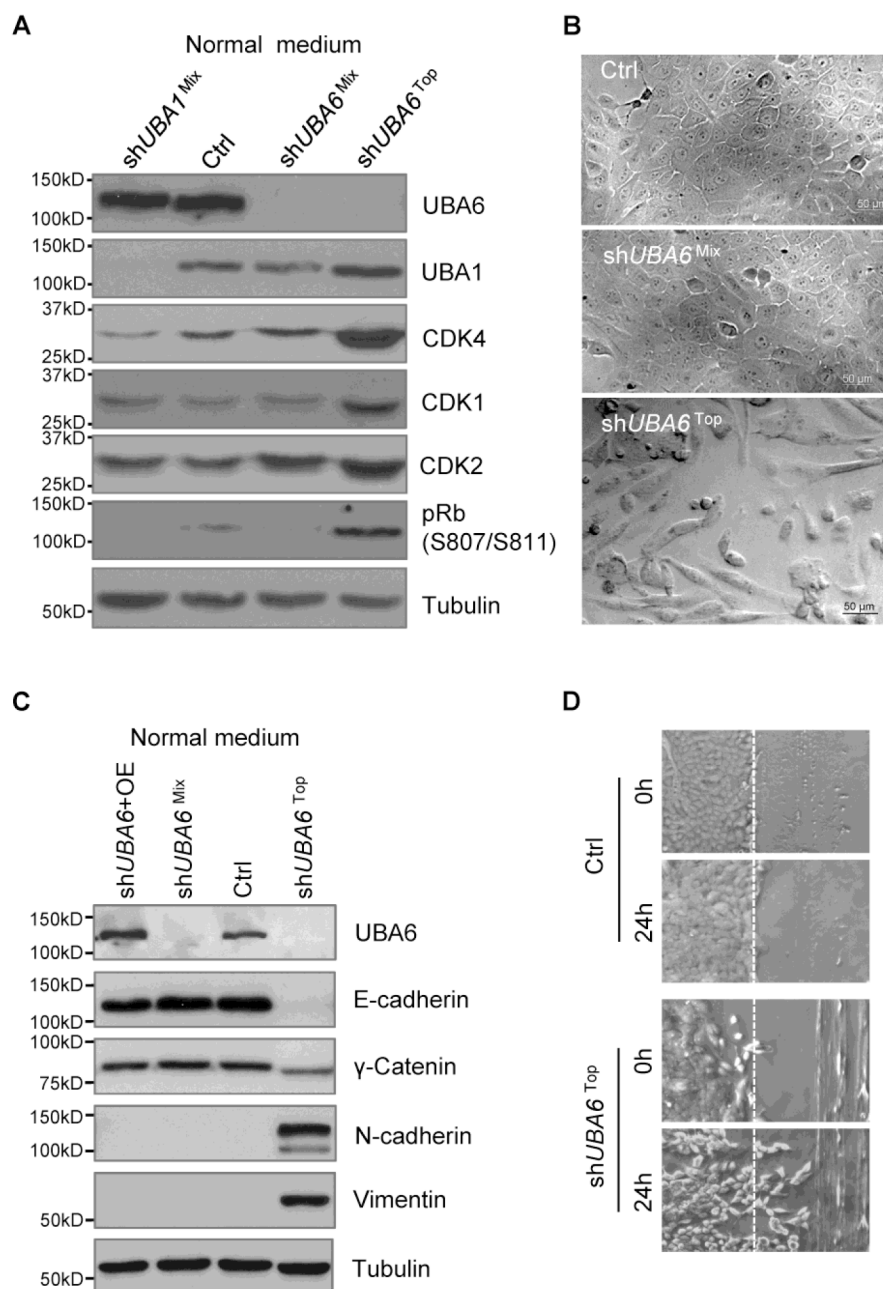

**Supplementary Figure 2: UBA6 depletion leads to cell cycle deregulation and EMT in shUBA6<sup>Top</sup> cells in normal medium.** (A) Expression of cell cycle-regulatory proteins in shUBA6<sup>Top</sup> cells. (B) Spindle-like morphology in shUBA6<sup>Top</sup> MCF10A cells (10x magnification). (C) EMT markers in shUBA6<sup>Top</sup> cells. (D) shUBA6<sup>Top</sup> cells show more profound motility than parental MCF-10A cells, in a wound-healing assay in culture. To minimize effects of proliferation, cells were incubated in DMEM/F12 medium supplemented only with 0.25% horse serum for 24 hours in prior to scratching.

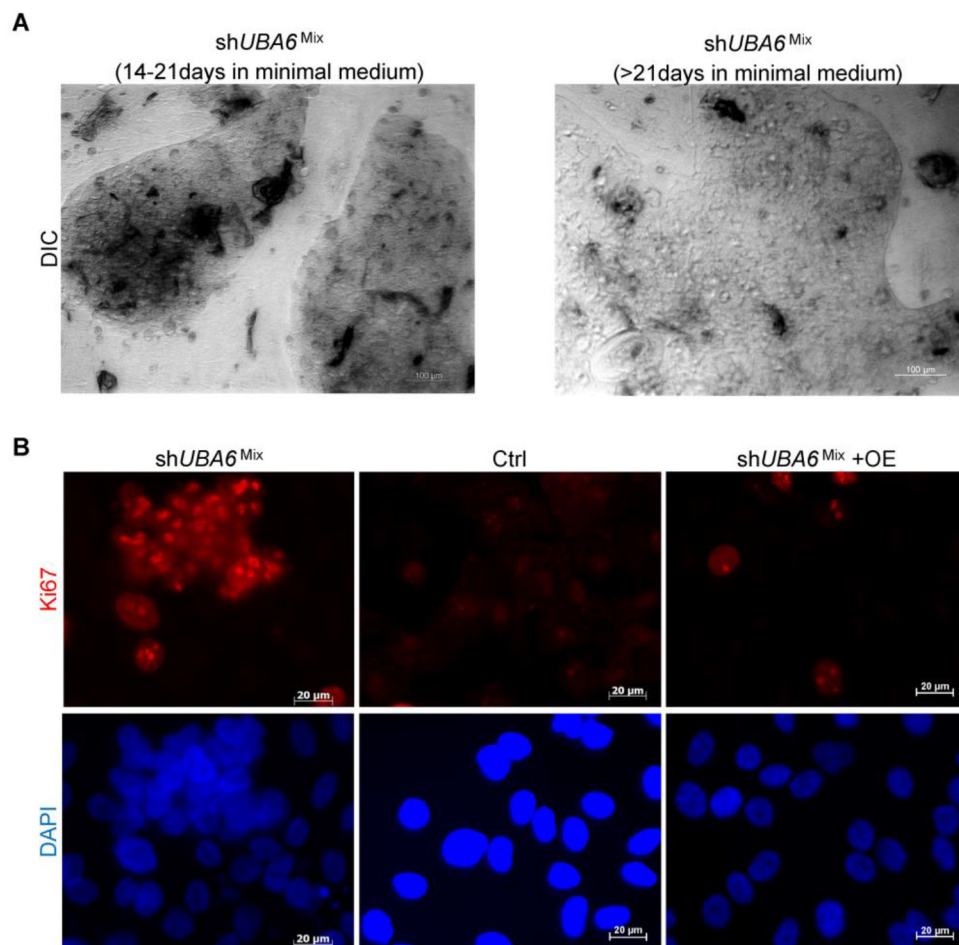

**Supplementary Figure 3: UBA6 depletion results in the formation of “island”-like cell clusters that are actively proliferating.** (A) Representative pictures showing that the “islands” keep expanding their boundaries during prolonged culture in minimal medium in confluent shUBA6 cells. (B) The MCF10A control cells, shUBA6<sup>Mix</sup> cells and shUBA6<sup>Mix</sup> +OE cells were densely plated on poly-lysine coated coverslips and cultured in minimal medium for 14 days, followed by immunofluorescence detection of proliferation marker Ki67. Slides were then photographed using Zeiss Axiovert 200M Fluorescence/Live cell Imaging Microscope (10x magnification).

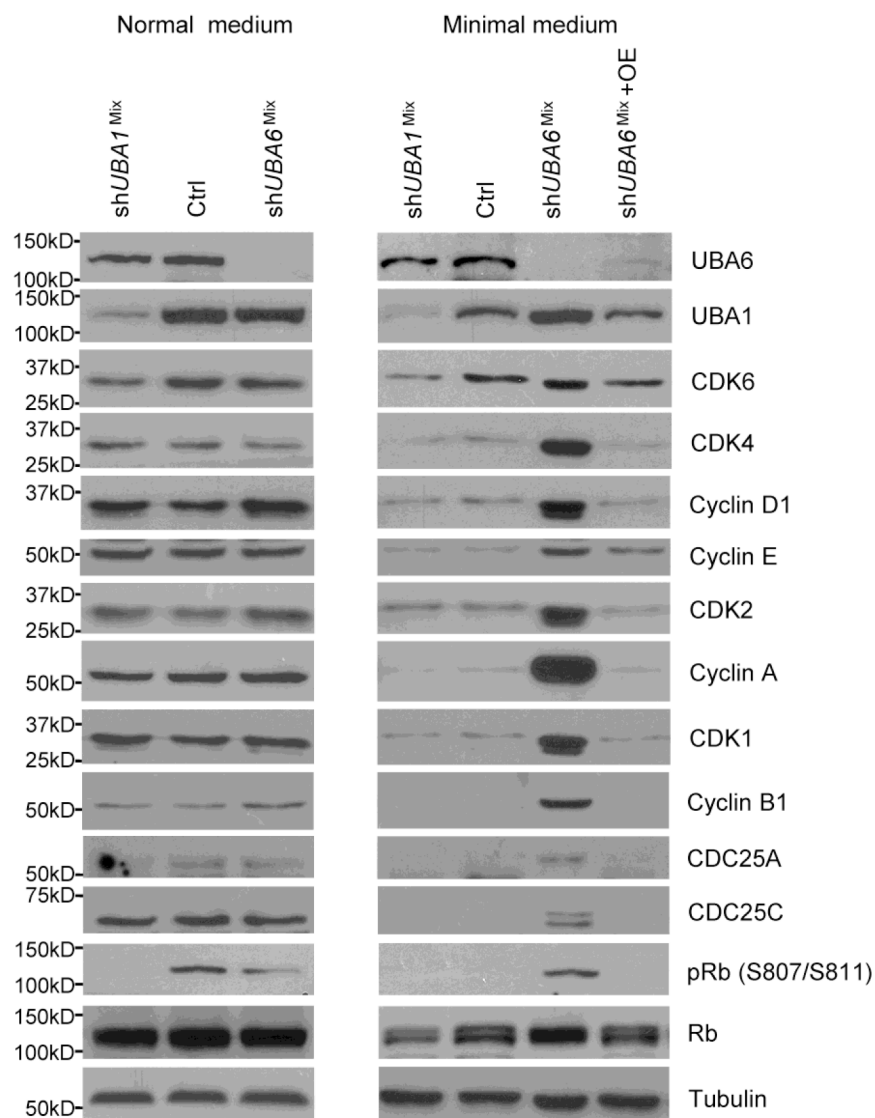

**Supplementary Figure 4: UBA6 depletion leads to upregulation of cell cycle regulators in *shUBA6<sup>Mix</sup>* cells in minimal medium.** The MCF10A control cells, *shUBA1<sup>Mix</sup>* cells, *shUBA6<sup>Mix</sup>* cells and *shUBA6<sup>Mix</sup> + OE* cells were cultured in normal medium or in minimal medium for 14 days, followed by immunoblotting for the indicated cell cycle regulators.

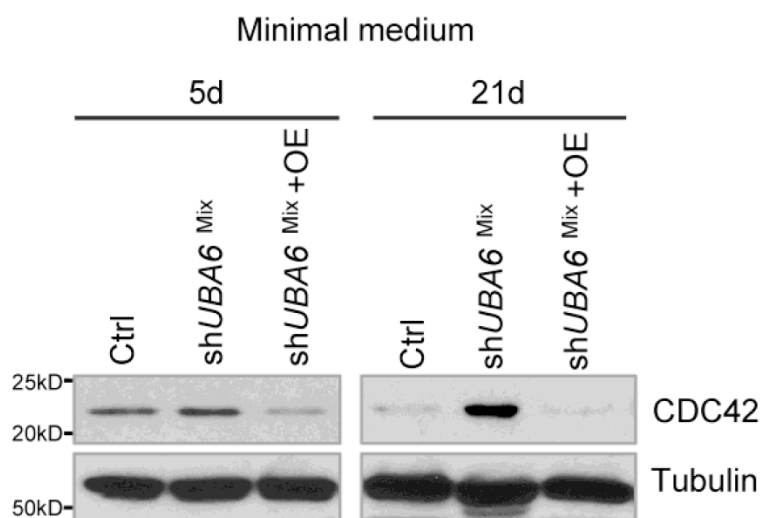

**Supplementary Figure 5: CDC42 protein levels are upregulated in shUBA6<sup>Mix</sup> cells cultured in minimal medium.** The MCF10A control cells, shUBA6<sup>Mix</sup> cells and shUBA6<sup>Mix</sup> + OE were cultured in minimal medium for 5 or 21 days, followed by immunoblotting for CDC42.

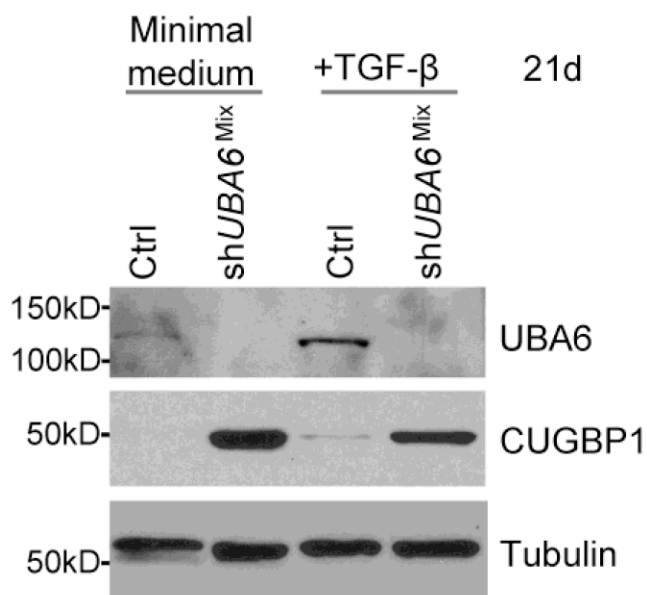

**Supplementary Figure 6: Elevated levels of CUGBP1 protein in shUBA6<sup>Mix</sup> cells after growth factor deprivation or TGF-β treatment.** The MCF10A control cells and shUBA6<sup>Mix</sup> cells were cultured in minimal medium or in normal medium plus 1 ng/mL TGF-β for 21 days. The cells were then collected for detection of CUGBP1 by immunoblotting.
